# Supplementary material for: Molecular simulations inform biomass dissolution in ionic liquids in pursuit of benign solvent-system design
Source: Royal Society of Chemistry journal article supplement (doi:10.1039/d3gc01981k), 2023-01-01
Supplement: d3gc01981k1.pdf [file d3gc01981k1.pdf]

## Molecular simulations inform biomass dissolution in ionic liquids in pursuit of benign solvent-system design

Preston Griffin<sup>a</sup> and Jakub Kostal<sup>\*a</sup>

**Table S1:** A complete list of ILs, corresponding solubility metrics obtained from experiment and computed values for biomass dissolution and ecotoxicity as used in the present analysis <sup>a</sup>

| IL                                       | Lignin solubility (g/kg) | T (°C) | Exptl study <sup>1-4</sup> | Pred. sol. Coulomb/LJ (g/kg) | Log P <sub>L/C</sub> (exptl source) | Log P <sub>o/w</sub> | ΔE, HOMO-LUMO gap (eV) |
|------------------------------------------|--------------------------|--------|----------------------------|------------------------------|-------------------------------------|----------------------|------------------------|
| [Bm2im][BF <sub>4</sub> ]                | 14.50                    | 120.0  | Pu et al.                  | 54.8/26.6                    | -0.16 (L)                           | 2.98                 | 6.74                   |
| [Bmim][Br]                               | 17.50                    | 75.00  | Pu et al.                  | 60.4/65.3                    | -1.10 (LC)                          | 5.32                 | 7.25                   |
| [Bmim][Cl]                               | 13.90                    | 75.00  | Pu et al.                  | 28.2/83.4                    | 1.26(LC)                            | 6.26                 | 6.18                   |
| [Bmim][MeSO <sub>4</sub> ]               | 61.80                    | 25.00  | Pu et al.                  | 135.7/49.7                   | -0.22(LC)                           | 6.08                 | 6.10                   |
| [Bmim][MeSO <sub>4</sub> ]               | 312.00                   | 50.00  | Pu et al.                  | 378.3/244.8                  | 0.49(LC)                            | 6.98                 | 6.10                   |
| [Bmim][PF <sub>6</sub> ]                 | 0                        | 120.0  | Pu et al.                  | 23.3/64.0                    | N/A(LC)                             | 5.56                 | 8.00                   |
| [Bmpy][PF <sub>6</sub> ]                 | 0                        | 120.0  | Pu et al.                  | 9.4/53.5                     | N/A(LC)                             | 7.88                 | 5.99                   |
| [Hmim][CF <sub>3</sub> SO <sub>3</sub> ] | 10.00                    | 50.00  | Pu et al.                  | 23.9/172.8                   | -1.41(LC)                           | 2.89                 | 10.47                  |
| [Hmim][CF <sub>3</sub> SO <sub>3</sub> ] | 275.00                   | 70.00  | Pu et al.                  | 224.2/111.1                  | 0.03(LC)                            | 2.89                 | 10.47                  |
| [Mmim][MeSO <sub>4</sub> ]               | 74.20                    | 25.00  | Pu et al.                  | 72.4/200                     | 0.29(LC)                            | 2.13                 | 5.21                   |
| [Mmim][MeSO <sub>4</sub> ]               | 344.00                   | 50.00  | Pu et al.                  | 284.4/40.9                   | 0.77(LC)                            | 2.13                 | 5.21                   |
| [Py][For]                                | 280.00                   | 25.00  | Pu et al.                  | 205.6/152.4                  | 1.02(L)                             | 1.42                 | 1.66                   |
| [Ch][Ala]                                | 180.00                   | 90.00  | Liu et al.                 | 263.4/143.3                  | 1.56(LC)                            | -2.94                | 6.73                   |
| [Ch][Arg]                                | 110.00                   | 90.00  | Liu et al.                 | 112.0/119.0                  | 1.34(LC)                            | -4.03                | 6.76                   |
| [Ch][Asn]                                | 16.00                    | 90.00  | Liu et al.                 | 295.3/147.6                  | 0.51(LC)                            | -3.27                | 6.47                   |
| [Ch][Asp]                                | 10.00                    | 90.00  | Liu et al.                 | 244.9/74.4                   | 0.30(LC)                            | -1.44                | 7.79                   |
| [Ch][Gln]                                | 50.00                    | 90.00  | Liu et al.                 | 106.2/273.1                  | 1.00(LC)                            | -2.93                | 6.97                   |
| [Ch][Glu]                                | 26.00                    | 90.00  | Liu et al.                 | 189.8/54.5                   | 0.72(LC)                            | -1.26                | 4.43                   |
| [Ch][Gly]                                | 220.00                   | 90.00  | Liu et al.                 | 172.1/299.1                  | 1.64(LC)                            | -2.88                | 7.23                   |
| [Ch][His]                                | 140.00                   | 90.00  | Liu et al.                 | 170.2/201.1                  | 1.45(LC)                            | -2.71                | 7.27                   |
| [Ch][Ile]                                | 170.00                   | 90.00  | Liu et al.                 | 24.9/8.8                     | 1.53(LC)                            | -1.87                | 6.71                   |
| [Ch][Leu]                                | 150.00                   | 90.00  | Liu et al.                 | 240/64.4                     | 1.48(LC)                            | -2.09                | 6.37                   |
| [Ch][Lys]                                | 140.00                   | 90.00  | Liu et al.                 | 258.8/60.4                   | 1.45(LC)                            | -3.34                | 4.42                   |
| [Ch][Met]                                | 150.00                   | 90.00  | Liu et al.                 | 19.29/132.3                  | 1.47(LC)                            | -2.02                | 6.86                   |
| [Ch][Phe]                                | 140.00                   | 90.00  | Liu et al.                 | 200.0/15.0                   | 1.45(LC)                            | -1.70                | 5.56                   |
| [Ch][Pro]                                | 170.00                   | 90.00  | Liu et al.                 | 162.2/52.0                   | 1.53(LC)                            | -1.11                | 5.35                   |

|                               |        |       |               |             |          |       |      |
|-------------------------------|--------|-------|---------------|-------------|----------|-------|------|
| [Ch][Ser]                     | 170.00 | 90.00 | Liu et al.    | 179.3/20.8  | 1.53(LC) | -1.96 | 6.93 |
| [Ch][Thr]                     | 160.00 | 90.00 | Liu et al.    | 147.0/176.9 | 1.51(LC) | -3.31 | 4.99 |
| [Ch][Trp]                     | 90.00  | 90.00 | Liu et al.    | 42.8/115.8  | 1.26(LC) | -0.98 | 6.63 |
| [Ch][Val]                     | 70.00  | 90.00 | Liu et al.    | 63.8/43.6   | 1.15(LC) | -2.18 | 7.35 |
| [BMPyr][Tf <sub>2</sub> N]    | 1.00   | 90.00 | Glas et al.   | 38.4/18.6   | 2.77(L)  | 5.17  | 7.25 |
| [BMPyr][N(CN) <sub>2</sub> ]  | 390.00 | 90.00 | Glas et al.   | 165.0/306.3 | 3.36(L)  | 2.98  | 6.98 |
| [Ch][Oac]                     | 280.00 | 90.00 | Glas et al.   | 148.5/266.9 | 2.71(L)  | -1.12 | 6.95 |
| [p4441][Cl]                   | 330.00 | 90.00 | Glas et al.   | 160.7/191.2 | 0.72(L)  | 0.15  | 4.66 |
| [p4441][MeSO <sub>4</sub> ]   | 460.00 | 90.00 | Glas et al.   | 221.7/126.8 | 0.58(L)  | 1.43  | 8.12 |
| [p66614][N(CN) <sub>2</sub> ] | 270.00 | 90.00 | Glas et al.   | 113.6/83.4  | 0.22(L)  | 11.72 | 3.93 |
| [Mmim][Ac]                    | 500.00 | 90.00 | Rashid et al. | 96.8/81.0   | 0.40(L)  | -0.69 | 7.07 |
| [Py][Ac]                      | 240.00 | 25.00 | Rashid et al. | 151.9/36.5  | 0.95(L)  | -2.46 | 1.83 |
| [Py][Ac]                      | 700.00 | 75.00 | Rashid et al. | 205.8/10.2  | 1.42(L)  | -2.46 | 1.83 |
| [Py][Pro]                     | 500.00 | 90.00 | Rashid et al. | 11.5/15.6   | 1.57(L)  | -0.40 | 3.48 |
| [Pyr][Ac]                     | 500.00 | 90.00 | Rashid et al. | 16.0/117.4  | 0.68(L)  | -1.35 | 7.36 |

<sup>a</sup> Bm2im = 1-butyl-2,3-dimethylimidazolium; Bmim = 1-butyl-3-methylimidazolium; Bmpy = 1-butyl-3-methylpyridinium; Hmim = 1-hexyl-3-methylimidazolium; Mmim = 1,3-dimethylimidazolium; Py = pyridinium; BMPyr = 1-butyl-1-methylpyrrolidinium; Chol = cholinium; p4441 = tributyl methyl phosphonium; p66614 = trihexyl-tetradecylphosphonium; Pyrr = pyrrolidinium;

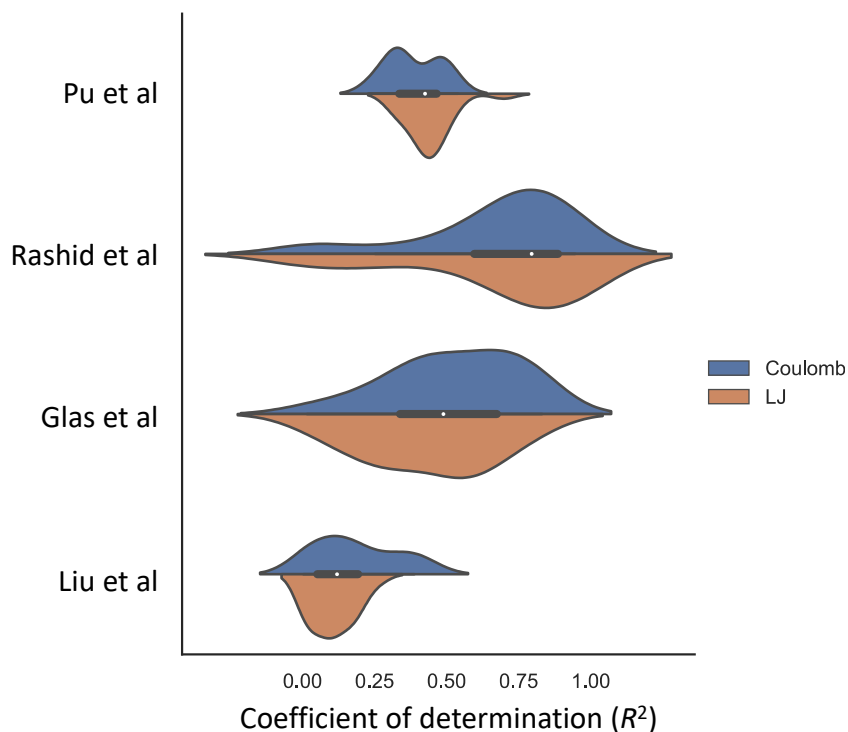

**Figure S1.** Distributions of coefficients of determination ( $R^2$ ) for univariate models correlating interaction energies (Coulomb or Lennard-Jones, LJ) and observed solubility, compiled per study across the 4 computational adaptations of guaiacyl glycerol- $\beta$ -guaiacyl ether (GG) in Kraft lignin (viz. Figure 2). The white dot inside each violin plot represents the median  $R^2$  value, and the grey bar represents the interquartile range (i.e., middle 50%).

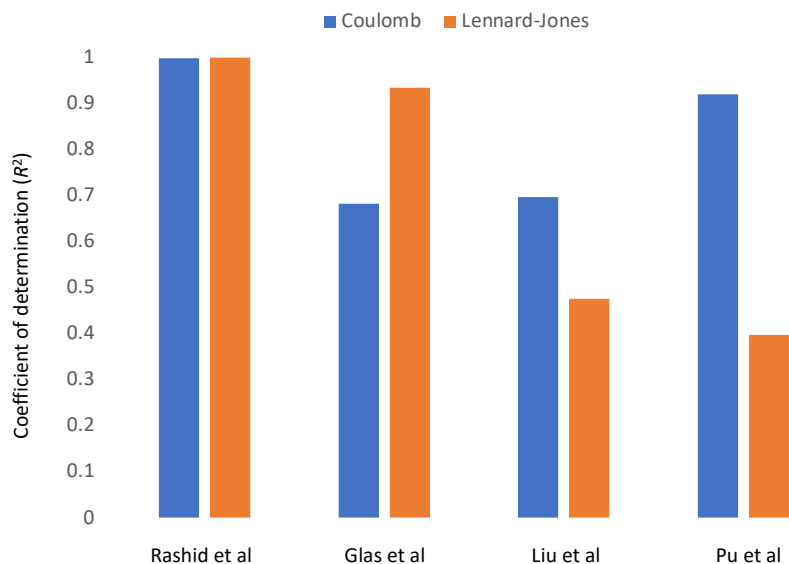

**Figure S2.** Coefficients of determination ( $R^2$ ) for multivariate linear regressions (MLRs), developed for each study by correlating interaction energies (Coulomb or Lennard-Jones, LJ) with observed solubility across the 4 computational adaptations of guaiacyl glycerol- $\beta$ -guaiacyl ether (GG) in Kraft lignin (viz. Figure 2).

a)

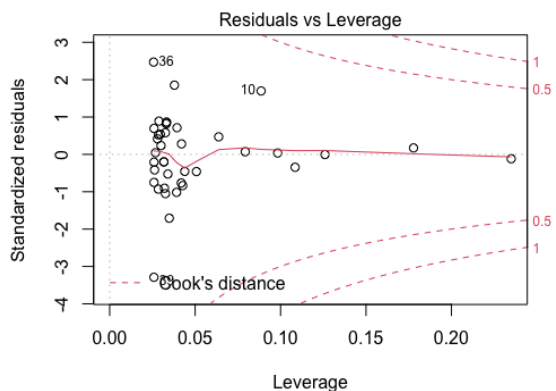

b)

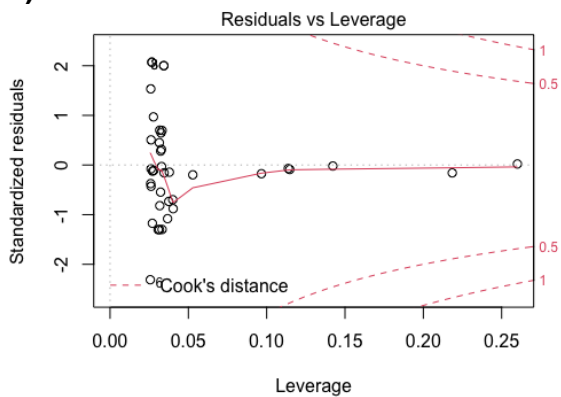

**Figure S3.** Williams plot used to evaluate the applicability domain (AD) of (a) Coulomb model and (b) LJ model.

**Reference:**

1. Pu, Y.; Jiang, N.; Ragauskas, A. J. Ionic Liquid as a Green Solvent for Lignin. *Journal of Wood Chemistry and Technology* 2007, 27 (1). <https://doi.org/10.1080/02773810701282330>.
2. Liu, Q.-P.; Hou, X.-D.; Li, N.; Zong, M.-H. Ionic Liquids from Renewable Biomaterials: Synthesis, Characterization and Application in the Pretreatment of Biomass. *Green Chem.* 2012, 14 (2). <https://doi.org/10.1039/C2GC16128A>.
3. Glas, D.; van Doorslaer, C.; Depuydt, D.; Liebner, F.; Rosenau, T.; Binnemans, K.; de Vos, D. E. Lignin Solubility in Non-Imidazolium Ionic Liquids. *Journal of Chemical Technology & Biotechnology* 2015, 90 (10). <https://doi.org/10.1002/jctb.4492>.
4. Rashid, T.; Kait, C. F.; Regupathi, I.; Murugesan, T. Dissolution of Kraft Lignin Using Protic Ionic Liquids and Characterization. *Ind Crops Prod* 2016, 84. <https://doi.org/10.1016/j.indcrop.2016.02.017>.
